# Supplementary material for: Construction of bimetallic phosphide nanostructures with in situ growth, reduction, and phosphidation of ultra-thin graphene layers as highly efficient catalysts towards the OER
Source: Royal Society of Chemistry journal article supplement (doi:10.1039/d3dt03143h), 2023-12-15
Supplement: d3dt03143h1.pdf [file d3dt03143h1.pdf]

Construction of bimetallic phosphides  
nanostructures with in-situ growth, reduction,  
and phosphidation of ultra-thin graphene  
layers as highly efficient catalysts towards  
electrocatalytic oxygen evolution

Dengxia Zhu, Huiting Bi\*, Chaolong Wang, Zheng Zhang, Junjiang Zhu\*

*Hubei Key Laboratory of Biomass Fibers and Eco-dyeing & Finishing, College of  
Chemistry and Chemical Engineering, Wuhan Textile University, Wuhan, 430200, PR  
China*

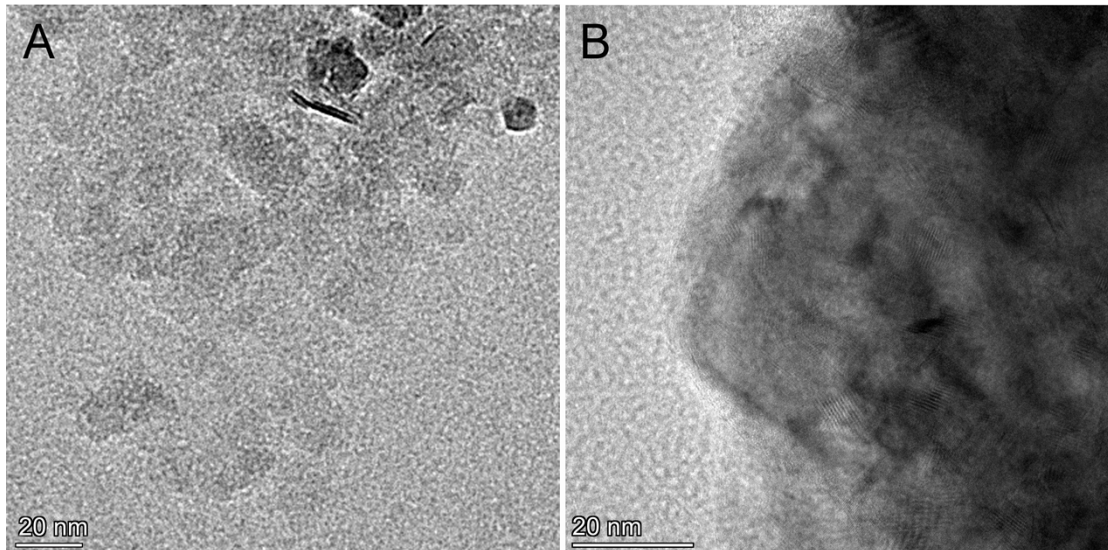

**Fig. S1.** TEM images of  $\text{rGO@FeNiSiO}_x$  and  $\text{rGO@FeNi}$ .

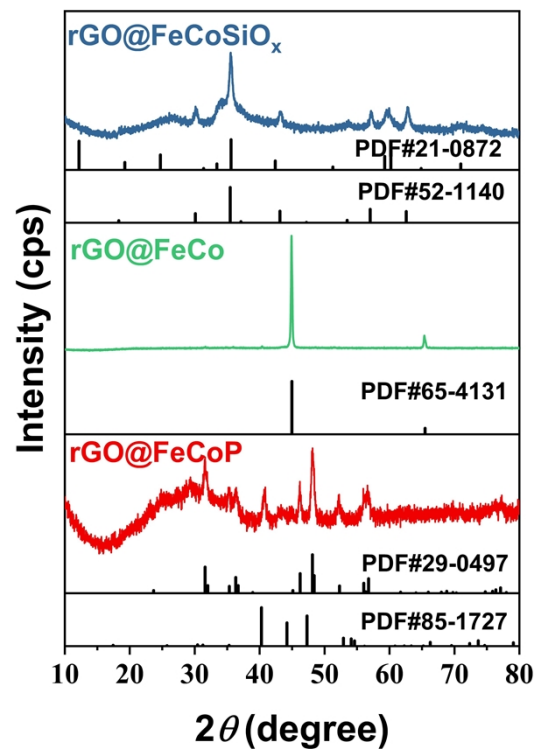

**Fig. S2.** XRD patterns of  $\text{rGO@FeCoSiO}_x$ ,  $\text{rGO@FeCo}$ ,  $\text{rGO@FeCoP}$ .

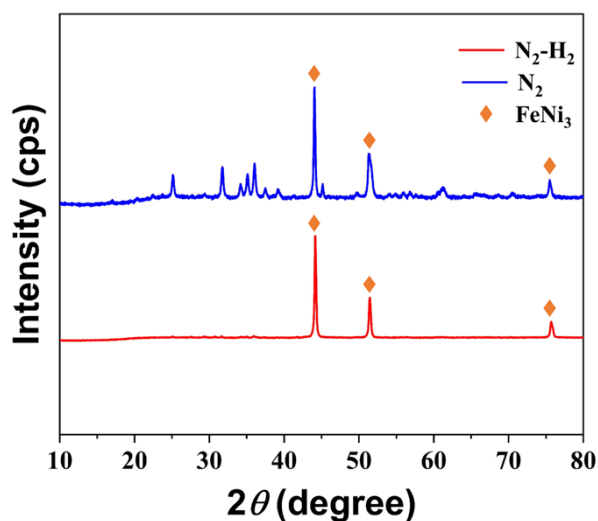

Fig. S3. XRD of catalysts calcined under  $N_2-H_2$  and  $N_2$  atmosphere.

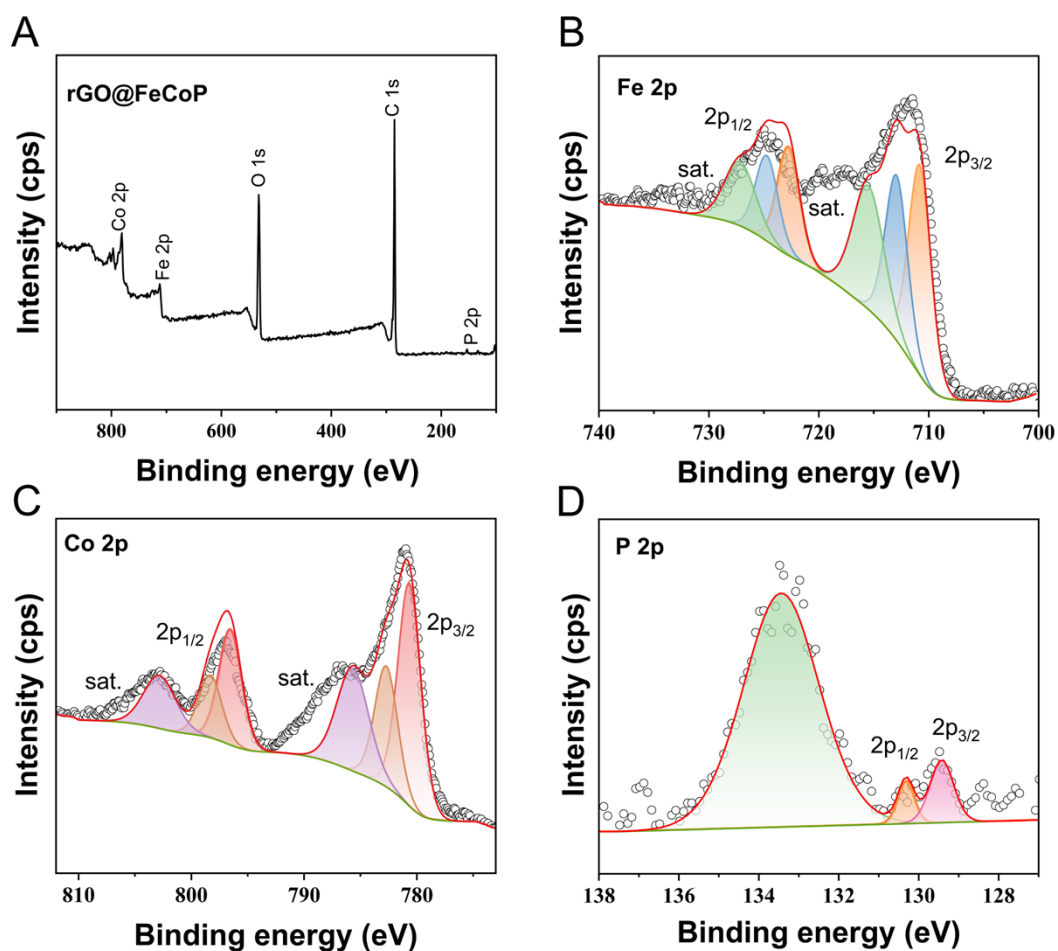

Fig. S4. XPS spectra of rGO@FeCoP (A) survey spectra. (B) Fe 2p. (C) Co 2p. (D) P 2p spectra.

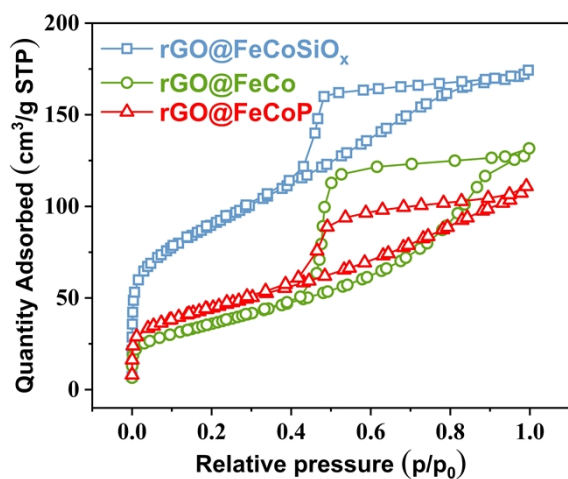

**Fig. S5.** N<sub>2</sub> adsorption–desorption isotherms of rGO@FeCoSiO<sub>x</sub>, rGO@FeCo, rGO@FeCoP.

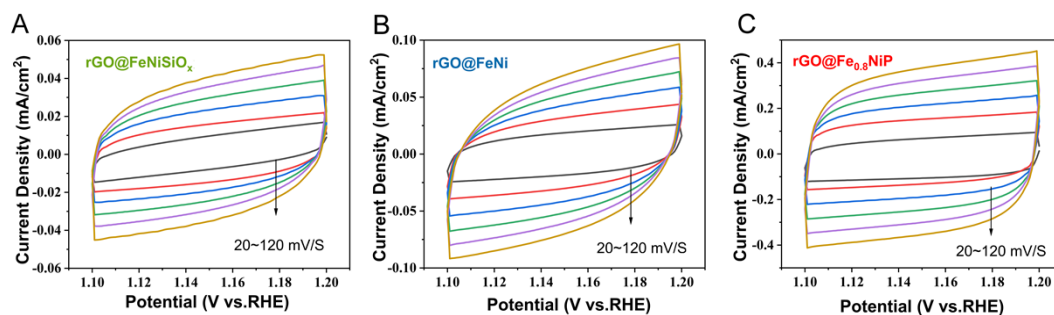

**Fig. S6.** (A-C) CV curves at different scan rates: 20, 40, 60, 80, 100, and 120 mV s<sup>-1</sup> from inside to outside.

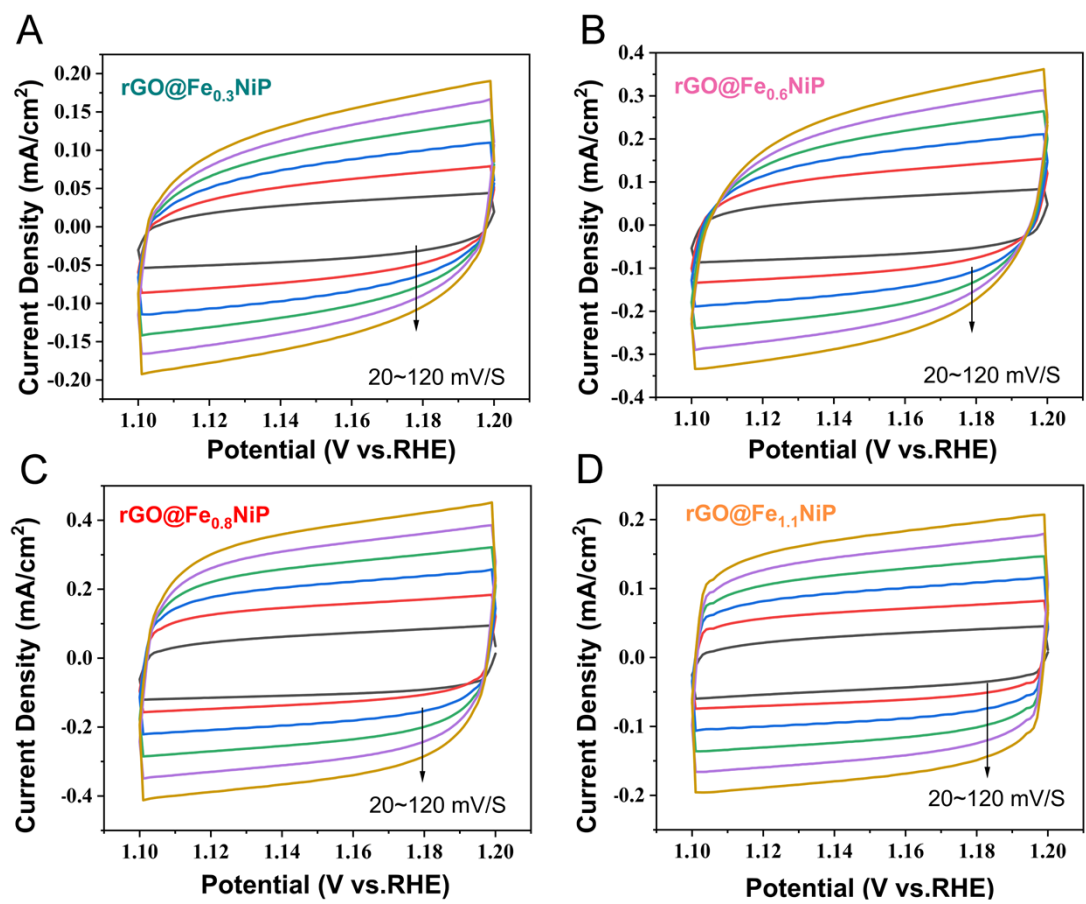

**Fig. S7.** (A-D) CV curves at different scan rates: 20, 40, 60, 80, 100, and 120 mV s<sup>-1</sup> from inside to outside.

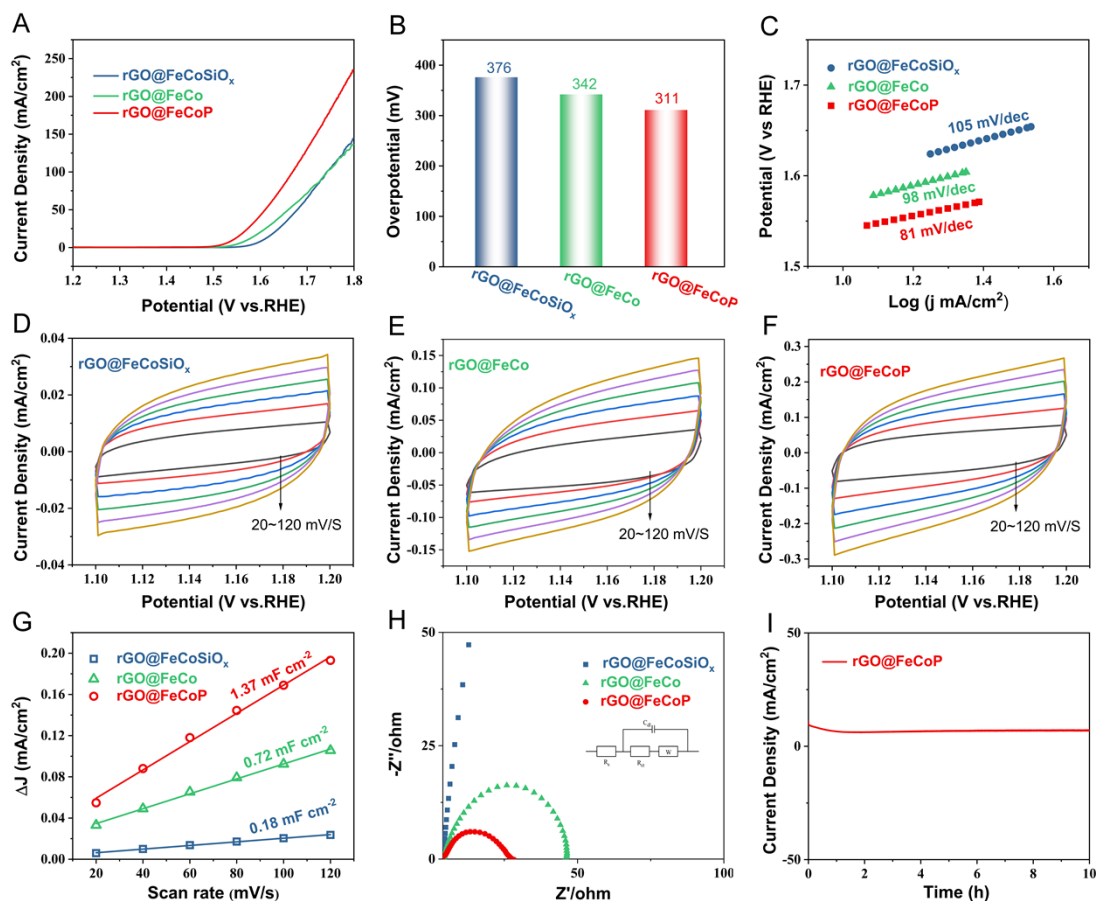

**Fig. S8.** OER electrocatalytic performance of rGO@FeCoSiO<sub>x</sub>, rGO@FeCo, rGO@FeCoP. (A) Polarization curves in 1.0 M KOH at a scan rate of 5 mV s<sup>-1</sup>. (B) Comparison of the overpotentials at the current density of 10 mA cm<sup>-2</sup>. (C) Corresponding Tafel plots. (D-F) CV curves at different scan rates: 20, 40, 60, 80, 100, and 120 mV s<sup>-1</sup> from inside to outside. (G) CV current density versus scan Rate. (H) Nyquist plots. (I) Chronopotentiometry curves of rGO@FeCoP at 1.54 V vs. RHE.

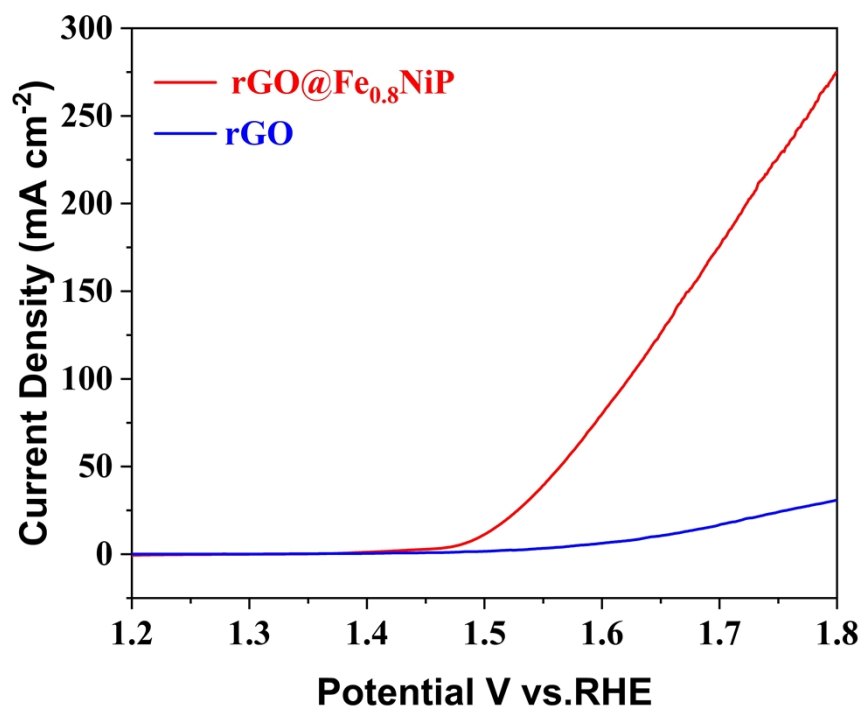

**Fig. S9.** Polarization curves of rGO@Fe<sub>0.8</sub>NiP and rGO in 1.0 M KOH at a scan rate of 5 mV s<sup>-1</sup>.

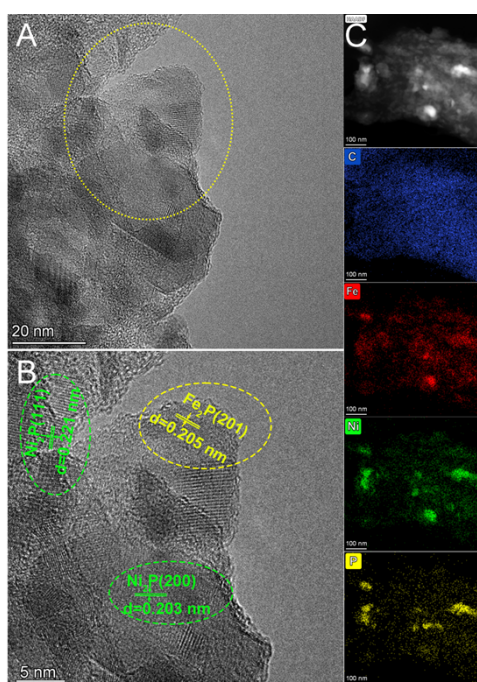

**Fig. S10.** TEM images (A) and HRTEM images (B) of rGO@FeNiP(recycled), (C) STEM image and EDS elemental mapping of rGO@FeNiP(recycled).

**Table S1.** OER activity comparison for the samples tested in this work with recently reported catalysts in 1 M KOH.

| materials                                                 | Electrolyte (M, KOH) | overpotential (mV) at 10 mA/cm <sup>2</sup> | refs      |
|-----------------------------------------------------------|----------------------|---------------------------------------------|-----------|
| rGO@Fe <sub>0.8</sub> Ni-P                                | 1                    | 266                                         | this work |
| rGO@FeCo-P                                                | 1                    | 311                                         | this work |
| rGO/Co-P                                                  | 1                    | 333                                         | 1         |
| CoPNR/C                                                   | 1                    | 320                                         | 2         |
| Ni <sub>2</sub> P@C                                       | 1                    | 495                                         | 3         |
| FeNiP / NC                                                | 1                    | 310                                         | 4         |
| NiFeP@NPC                                                 | 1                    | 350                                         | 5         |
| (Co <sub>0.54</sub> Fe <sub>0.46</sub> )P <sub>2</sub>    | 1                    | 370                                         | 6         |
| C-(Co <sub>0.54</sub> Fe <sub>0.46</sub> ) <sub>2</sub> P | 0.1                  | 371                                         | 7         |

**Table S2.** R<sub>ct</sub> estimated by fitting the equivalent circuit against the EIS data.

| materials                 | R <sub>ct</sub> (Ω) |
|---------------------------|---------------------|
| rGO@FeNiSiO <sub>x</sub>  | 249.1               |
| rGO@FeNi                  | 50.7                |
| rGO@Fe <sub>0.8</sub> NiP | 8.6                 |
| rGO@Fe <sub>0.3</sub> NiP | 18.1                |
| rGO@Fe <sub>0.6</sub> NiP | 15.5                |
| rGO@Fe <sub>1.1</sub> NiP | 15.8                |

## References

- 1 P. Li, H. C. Zeng, *ACS Appl. Mater. Interfaces.*, 2019, **11**, 46825-46838.
- 2 J. Chang, Y. Xiao, M. Xiao, J. Ge, C. Liu and W. Xing, *ACS Catal.*, 2015, **5**, 6874-6878.
- 3 Q. Kang, M. Li, J. Shi, Q. Lu and F. Gao, *ACS Appl. Mater. Interfaces.*, 2020, **12**, 19447-19456.
- 4 Y. Du, Y. Han, X. Huai, Y. Liu, C. Wu, Y. Yang and L. Wang, *Int. J. Hydrogen Energy*, 2018, **43**, 22226-22234.



5 F. C. Jian Wang, *Appl. Catal., B*, 2019, **254**, 292-299.

6 A. Mendoza-Garcia, H. Zhu, Y. Yu, Q. Li, L. Zhou, D. Su, M. J. Kramer and S. Sun, *Angewandte Chemie International Edition*, 2015, **54**, 9642-9645.

7 A. Mendoza-Garcia, D. Su and S. Sun, *Nanoscale*, 2016, **8**, 3244-3247.
